# Supplementary material for: Using Synthetic Mouse Spike-In Transcripts to Evaluate RNA-Seq Analysis Tools
Source: PubMed Central journal article supplement (PMC4839710; doi:10.1371/journal.pone.0153782), 2016-04-21

Fig. S2. Scatter plot of DESeq2 normalized ratio between ERCC mix2 and ERCC mix 1 versus the expected ratio for day 4

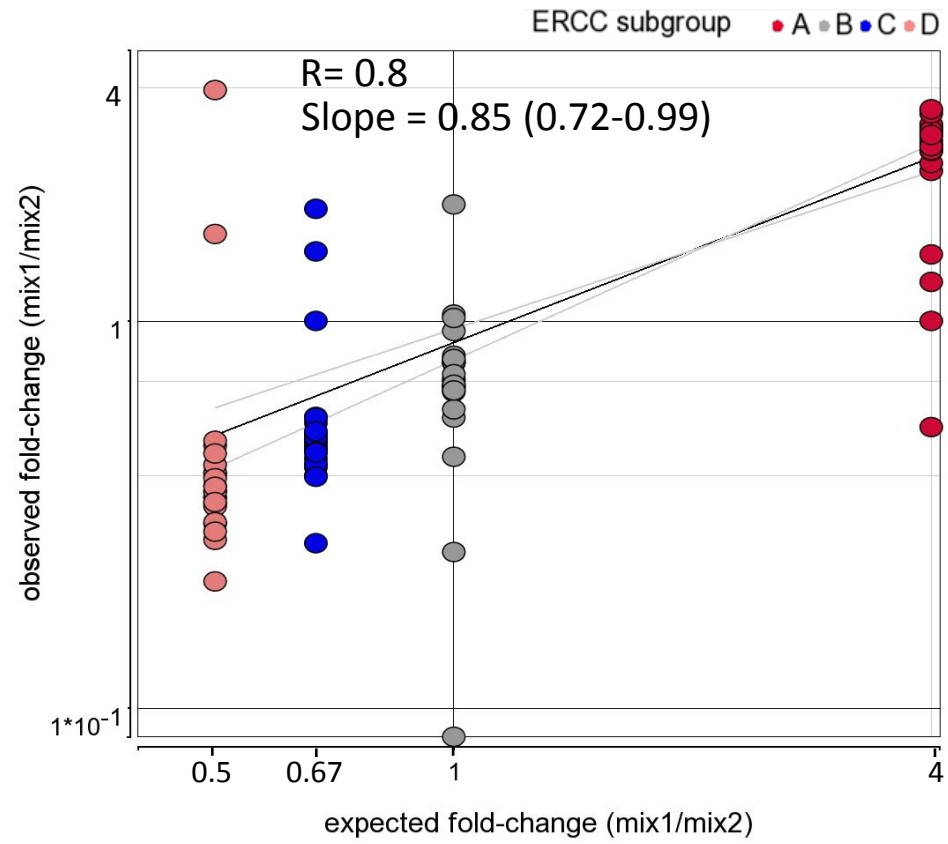

Supplement: pone.0153782.s002.pdf [file pone.0153782.s002.pdf]
