# Supplementary material for: Using Synthetic Mouse Spike-In Transcripts to Evaluate RNA-Seq Analysis Tools
Source: PubMed Central journal article supplement (PMC4839710; doi:10.1371/journal.pone.0153782), 2016-04-21
Supplement: pone.0153782.s003.pdf [file pone.0153782.s003.pdf]

Fig. S3 Scatter plots of mouse single locus spikes: expected vs. observed concentrations

$\log_2$  FPKM

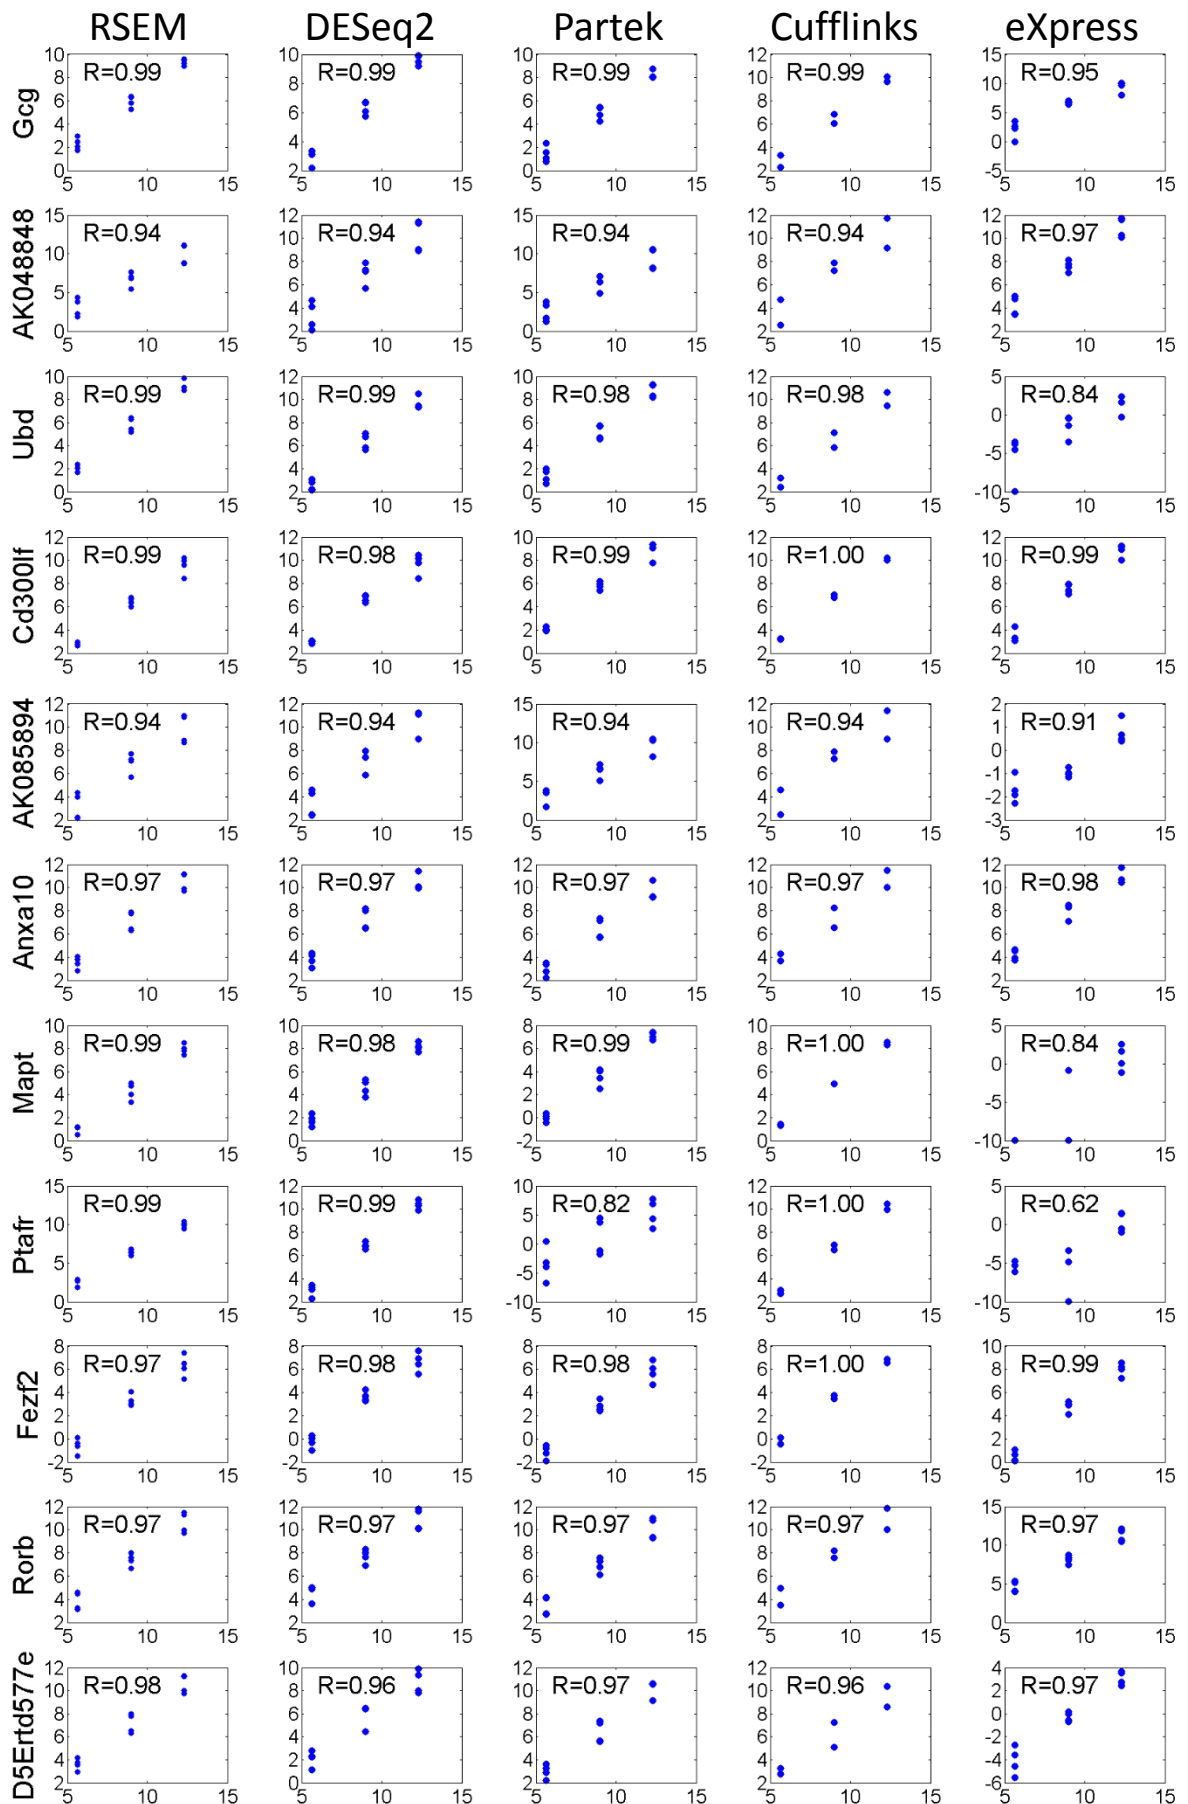

Spike-ins concentration ( $\log_2$  attomoles/ $\mu$ l)

$\log_2$  FPKM

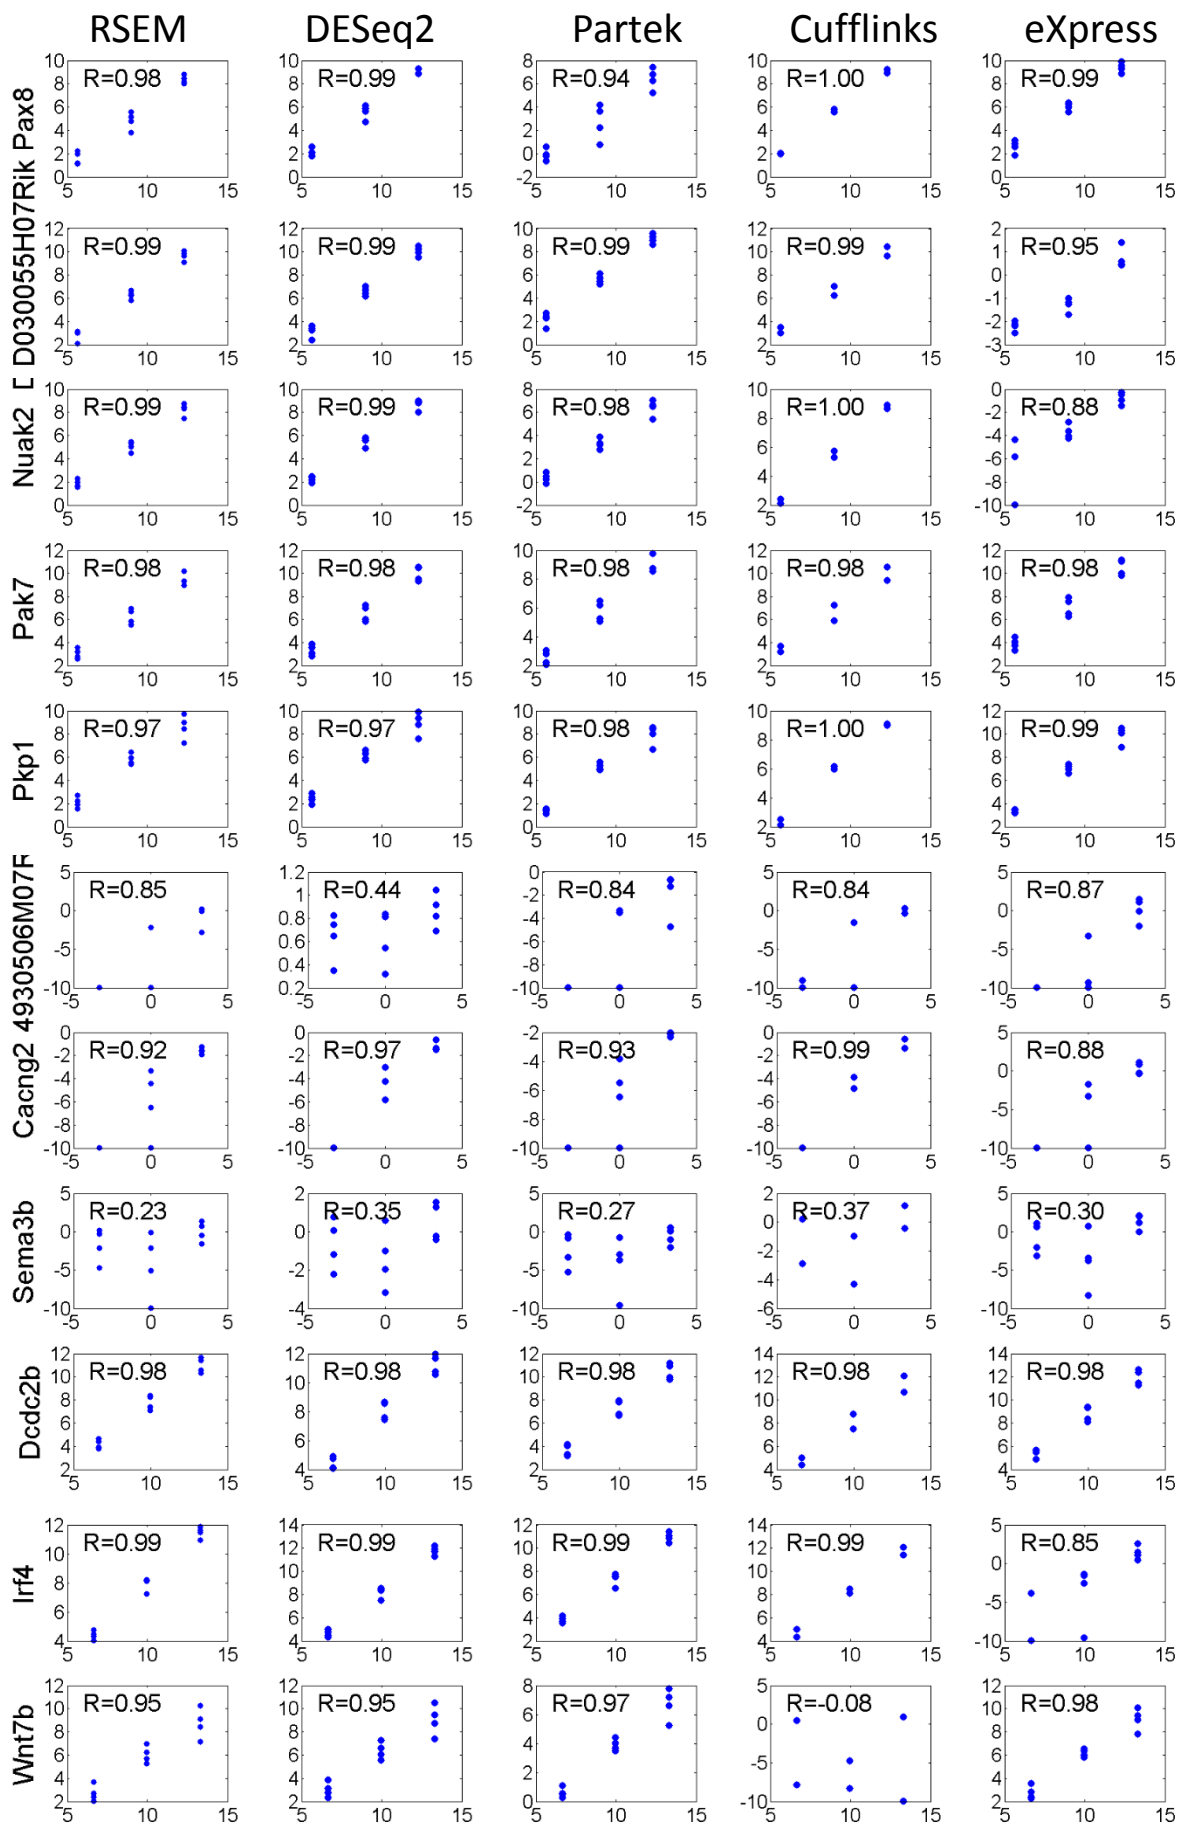

Spike-ins concentration ( $\log_2$  attomoles/ $\mu$ l)
