# Supplementary material for: Using Synthetic Mouse Spike-In Transcripts to Evaluate RNA-Seq Analysis Tools
Source: PubMed Central journal article supplement (PMC4839710; doi:10.1371/journal.pone.0153782), 2016-04-21

Fig S4. Abundance estimation of spikes with multiple isoforms per locus, using various bioinformatics tools

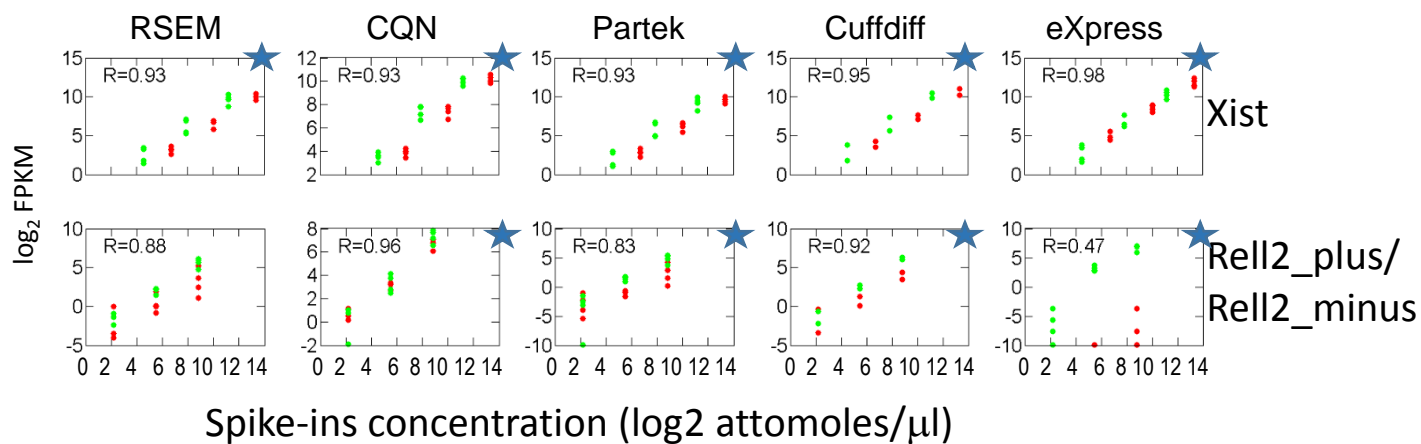

Supplement: pone.0153782.s004.pdf [file pone.0153782.s004.pdf]
