# Supplementary material for: Using Synthetic Mouse Spike-In Transcripts to Evaluate RNA-Seq Analysis Tools
Source: PubMed Central journal article supplement (PMC4839710; doi:10.1371/journal.pone.0153782), 2016-04-21

Fig. 5. ROC analysis using p values and IVT spike-ins (RefSeq+ annotation)

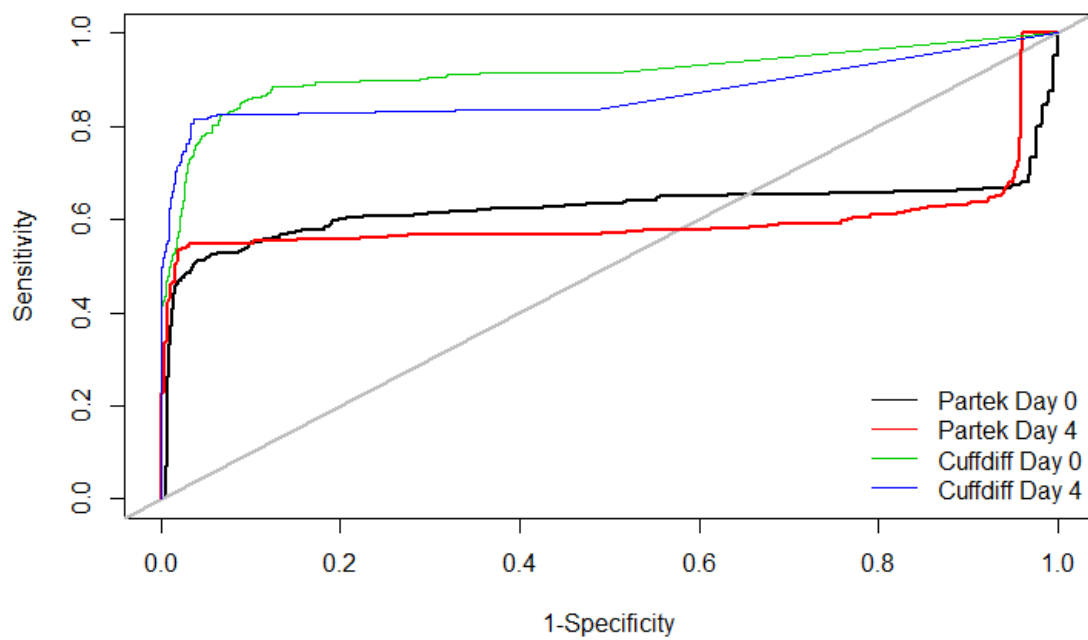

Supplement: pone.0153782.s005.pdf [file pone.0153782.s005.pdf]
