# Supplementary material for: Using Synthetic Mouse Spike-In Transcripts to Evaluate RNA-Seq Analysis Tools
Source: PubMed Central journal article supplement (PMC4839710; doi:10.1371/journal.pone.0153782), 2016-04-21

Fig. S6. Final Linear Regression Model plots with single spike-ins

Plot A shows expected spike-in values versus DESeq2-HTSeq model observed values.

Plot B shows expected spike-in values versus CQN-HTSeq model observed values.

A.

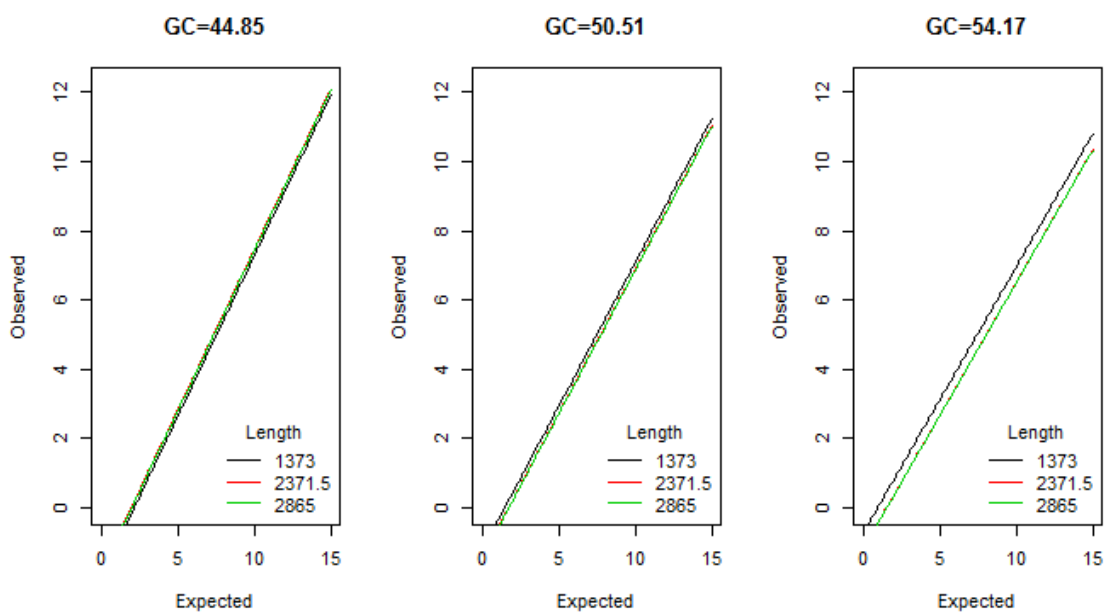

B.

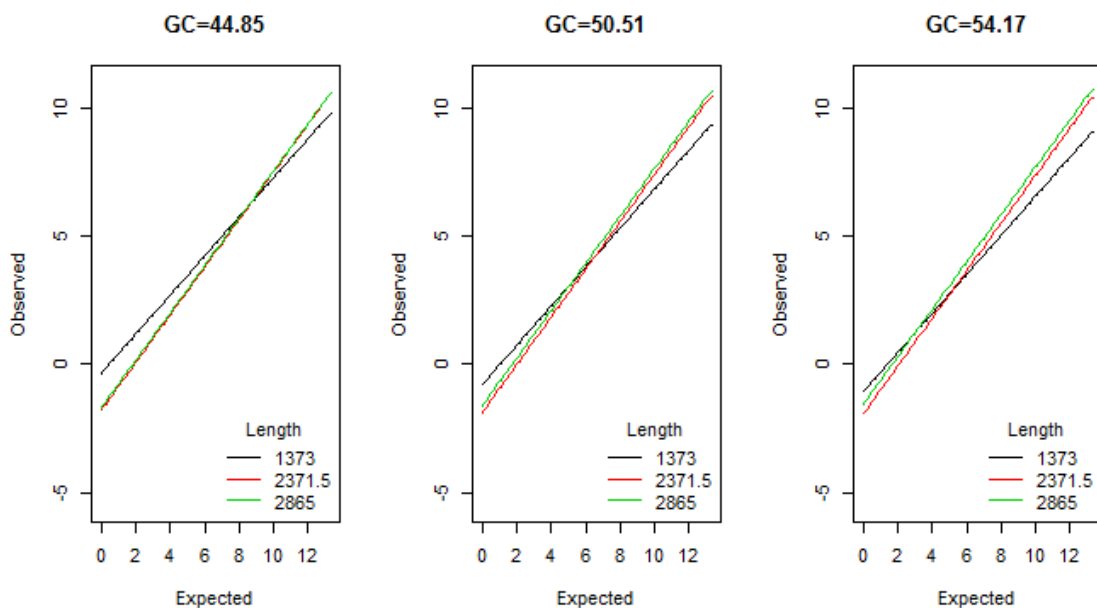

Supplement: pone.0153782.s006.pdf [file pone.0153782.s006.pdf]
